# Supplementary material for: Identification of Novel Pre-Erythrocytic Malaria Antigen Candidates for Combination Vaccines with Circumsporozoite Protein
Source: PubMed Central journal article supplement (PMC4951032; doi:10.1371/journal.pone.0159449), 2016-07-19

Protection in &lt; 2 models

Protection in 2 models

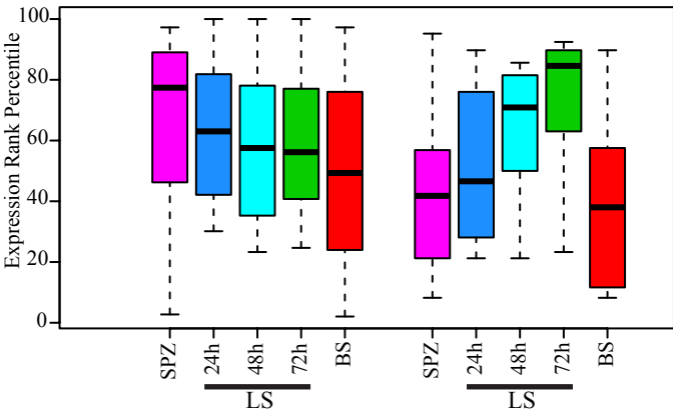

Supplement: pone.0159449.s005.pdf [file pone.0159449.s005.pdf]
