# Supplementary material for: Identification of Novel Pre-Erythrocytic Malaria Antigen Candidates for Combination Vaccines with Circumsporozoite Protein
Source: PubMed Central journal article supplement (PMC4951032; doi:10.1371/journal.pone.0159449), 2016-07-19
Supplement: pone.0159449.s006.pdf [file pone.0159449.s006.pdf]

**S1 Table. Primer used in qPCR used to confirm and quantify transcription of 131 candidate genes**

| <b>Primer Name</b> | <b>Primer Sequence</b>                |
|--------------------|---------------------------------------|
| PF3D7_1308500-1F   | TTTAATACAATGTGATGTTTTATATCC           |
| PF3D7_1308500-1R   | CACCTTCTATAATAAGAGATTGTTTG            |
| PF3D7_1308500-2F   | TTAATGTGACTAAGAGGGATGAG               |
| PF3D7_1308500-2R   | GTATTTCTTTGCATCTTTTCAAC               |
| PfLISP1-1F         | GATATCACCAACGATATTTTCAACA             |
| PfLISP1-1R         | TAAGTGGAGGATATGGGCTTA                 |
| PfLISP1-2F         | ATTTGTCTATTGCCGATGTG                  |
| PfLISP1-2R         | ATTATGTGAAATATCGTTGGTGA               |
| PfCSP-1F           | AGAACCAAGTGATAAGCACATAA               |
| PfCSP-1R           | ACTTGAATACCATTTCCACAAG                |
| PfCSP-2F           | AACCGAAATGTAGATGAAAATG                |
| PfCSP-2R           | GGACCATTCAGTTGAAAGAGA                 |
| PfHSP70-A-1F       | AATTGAAAGAAACACAACCATAC               |
| PfHSP70-A-1R       | TCACCTTCATATACTTGAATTAAGAC            |
| PfHSP70-A-2F       | ACTTATGCTGATAACCAACCAG                |
| PfHSP70-A-2R       | TTCGATTTGTGGTACCTTTC                  |
| PF3D7_1026400-1F   | CACCTTACAGAATTACCTTTTCC               |
| PF3D7_1026400-1R   | TTCGTAATCTTGTCTTCATTTTC               |
| PF3D7_1026400-2F   | CATAATACATTAACAACCTGGTGGTC            |
| PF3D7_1026400-2R   | TAAATATGTACCATCTGCATTCC               |
| PF3D7_1111200-1F   | AACAAATAACTGGGTAAACACAC               |
| PF3D7_1111200-1R   | GAGCATCTTCATATTTATCTTCAAC             |
| PF3D7_1111200-2F   | TGTATTAACAACACACTTGATGAAA             |
| PF3D7_1111200-2R   | CTTCCTTTATTTTATATTCTCTCCATT           |
| PF3D7_1122200-1F   | GAACATATGAAAGAAAAAATAGAGAATGTAAAT     |
| PF3D7_1122200-1R   | CTTGGATCCTTATACATCCATACATAACTTACCATC  |
| PF3D7_0304300-1F   | GAACCATGGTAAAATTTTCAAACATGTCAG        |
| PF3D7_0304300-1R   | CTTGGATCCTTTATTTTTTCAAATAATGCTTTAAATC |
| PF3D7_1241500-1F   | AACATGAACTTAAATACGGAAAATA             |
| PF3D7_1241500-1R   | TTACTTCGAAAACATTATGAAACA              |
| PF3D7_0518700-1F   | CACCCAAAACGATAATAAATGT                |
| PF3D7_0518700-1R   | ATTTGATTTGCTCCTAATATGC                |
| PF3D7_0518700-2F   | GAGAAAGAGCATATTAGGAGCA                |
| PF3D7_0518700-2R   | TTATTGGAATTTTCATTGTTCTG               |
| PfSLARP-1F         | AGCCAGGATGGAACCTTGTA                  |
| PfSLARP-1R         | TGTTATATGTTTCAAAGGATGGA               |
| PfSLARP-2F         | ACGAACAAAGAGTACATTAACATTT             |
| PfSLARP-2R         | AGTTCCATCCTGGCTTTTATT                 |
| PF3D7_0103400-1F   | AAAAGAGAAGGAGCATATTTTCG               |
| PF3D7_0103400-1R   | TATTTCTGTCTTGAAAGCATC                 |
| PF3D7_0103400-2F   | TTTATTCATGACGGGTGTTAG                 |
| PF3D7_0103400-2R   | AATATACCACACGTTTCTGTCTG               |
| PF3D7_1411500-1F   | AACACAATCCATAAATAGTGTGAA              |

|                  |                             |
|------------------|-----------------------------|
| PF3D7_1411500-1R | CATGTTCTTTTGGGCTTATTT       |
| PF3D7_1411500-2F | GATGGTGAAGATAATCTAAGTCAAG   |
| PF3D7_1411500-2R | CTTGTAATTTATTGTAAGGCTGTTC   |
| PF3D7_1434400-1F | GATTACACAAATCATATCCCAAC     |
| PF3D7_1434400-1R | TTTTGGCTAGCATTATCTTTACC     |
| PF3D7_1434400-2F | AAATTTCTGAAGTAGGGAATTATG    |
| PF3D7_1434400-2R | TGTAAAGTGTCCACATGAGCAAG     |
| PF3D7_1302200-1F | CTTGTTTGCACACATATTTT        |
| PF3D7_1302200-1R | TTGTTGTGTTCTTCTATTGCTTT     |
| PF3D7_1302200-2F | ATTGATAAAGCAATAGAAGAACACA   |
| PF3D7_1302200-2R | TATAAATCATCTTCTCGCGATT      |
| PF3D7_1302200-3F | ATATTGGGATTAGGATATTATGGA    |
| PF3D7_1302200-3R | AGCACCATCTTGATATTTTATATTG   |
| PF3D7_0730200-1F | AGTGACATAACAAAAGATTCCAC     |
| PF3D7_0730200-1R | TCATGTATTGCGTGCTTATG        |
| PF3D7_0730200-2F | TTTTAATAATCAACGAATTGAGTG    |
| PF3D7_0730200-2R | ATAATTCTACTACCCTTGAAATGC    |
| PF3D7_1444800-1F | GTATTATAAAGCTGGTGCAAGG      |
| PF3D7_1444800-1R | AGATGCATATCTAGCCAATCC       |
| PF3D7_1444800-2F | ATTTATCAATTCACGAACTGC       |
| PF3D7_1444800-2R | TTTGAGTTACAACCTGCACAAAC     |
| PF3D7_1444800-4F | CCAGGTATTAAGGTTGATAAAGG     |
| PF3D7_1444800-4R | AATACTCTTGCATCTTTCTGC       |
| PF3D7_0624000-1F | AATGTTTTACAAAGTGCATGTTC     |
| PF3D7_0624000-1R | GCCTTAGCAACTTTCCTACTATC     |
| PF3D7_0624000-2F | TTAGTTATGGATTGGTATTCAGC     |
| PF3D7_0624000-2R | TACGATTTACCTAAGTAAGCAC      |
| PF3D7_1203700-1F | ATTAACAATTAAGCAAACATGAAG    |
| PF3D7_1203700-1R | AAGATAATAGTCAACTGCATAGGG    |
| PF3D7_1203700-2F | TAATAGAAGGAGACTATGAAGTTGC   |
| PF3D7_1203700-2R | TTGCTTTCCTCTCGATAATAATAC    |
| PF3D7_1203700-3F | GAGCCAGTGTTATTACATACAGAAG   |
| PF3D7_1203700-3R | AAGAACTATCCCTATTAAGTGTG     |
| PF3D7_0506200-1F | CGGTTTCTATAAGGAATGCTG       |
| PF3D7_0506200-1R | TCTAGTACCTGTTAACATAATTCTTCC |
| PF3D7_0506200-2F | ACCATAATGATTACGATAACGAG     |
| PF3D7_0506200-2R | TTTCATAATTTTGTCTTCATAAGC    |
| PF3D7_0405500-1F | GCTCTAAATGTTATGCTATAAAGGAC  |
| PF3D7_0405500-1R | CAAGAATATTTCTCATTTCGTACATC  |
| PF3D7_0405500-2F | AGTAAGAAAAGGTTAAATGAAGCA    |
| PF3D7_0405500-2R | TCACATCATACAAAAGAAATGG      |
| PF3D7_0321700-1F | AACTTCAATCCTATAAGGAAATAAAAG |
| PF3D7_0321700-1R | TCTATTTGTATTTGAGCAATATGTTTA |
| PF3D7_0321700-2F | AAAAGTAGAATCCTTAGAACATGC    |
| PF3D7_0321700-2R | TTCGAATTGGTTTTAATATCTTG     |
| MSP1-p19-1F      | GTGTTGAAAATCCAAATCCTAC      |

|                       |                             |
|-----------------------|-----------------------------|
| MSP1-p19-1R           | TCGAAAAGTGGATAAGAATCAG      |
| PF3D7_1401700-1F      | AAAGAGATGAACAGAAAAGAAATG    |
| PF3D7_1401700-1R      | GATGAATTCTCGCTTTTATACG      |
| PF3D7_1401700-2F      | TTTGGTAGTTGATGTTCAAATAG     |
| PF3D7_1401700-2R      | AAATTATTACCCATGTTATTTATTCC  |
| PF3D7_0601700-1F      | AAATACCCACATGGTATAAATC      |
| PF3D7_0601700-1R      | TGATGCTTTGTCTTTAACTAAACC    |
| PF3D7_0601700-2F      | TGGTTTAGTTAAAGACAAAGCATC    |
| PF3D7_0601700-2R      | TTTCTGTAAACCTTTTCTTATGTTT   |
| PF3D7_1456100-1F      | CCAGACATTATATATTTTGACGAAT   |
| PF3D7_1456100-1R      | AATTGGCTTTGTTATTCATATTG     |
| PF3D7_1456100-2F      | ATGATAGATTCATTAAGGACTAAAGA  |
| PF3D7_1456100-2R      | TGGGTAAAAGGAGAATTGATAAG     |
| PF3D7_0917900-1F      | AGCATTAAACCAAAGATAATCACC    |
| PF3D7_0917900-1R      | TCAGCTTCAACATGTAAGATAACC    |
| PF3D7_0917900-2F      | TTTAGGAAAGTTTGAATTATCTGG    |
| PF3D7_0917900-2R      | TTTACCTGTACCTTTGTCTTCAG     |
| LSA1-PF3D7_1036400-4F | CAGAGGATTTATATGGTTCGTTTAG   |
| LSA1-PF3D7_1036400-4R | CTCTACTATTCCCTCTGTTGTCC     |
| LSA1-PF3D7_1036400-5F | ATCTGCTGACATACAAAATCATAC    |
| LSA1-PF3D7_1036400-5R | TCGTCATATTCAGCACTTATTTT     |
| LSA3-PF3D7_0220000-1F | TAGGGGATATGGATAAGGAAAG      |
| LSA3-PF3D7_0220000-1R | TTCCAATTTAGGTCTTTGAGC       |
| LSA3-PF3D7_0220000-2F | ACTTGGAGAAAGAGTTGAATCC      |
| LSA3-PF3D7_0220000-2R | TTTGGTCTTCTTTAACCTCTT       |
| PF3D7_1140000-1F      | GAGAATGTATCCTGGAAAGTAGC     |
| PF3D7_1140000-1R      | ATCTTCTACATTTTGTAACCTCCTG   |
| PF3D7_1140000-2F      | GGATCTTCTACATTACCCCTATG     |
| PF3D7_1140000-2R      | AAATGGTTTCAGTTGATACAGG      |
| PF3D7_0915200-1F      | TAGAGGGCGATTATTTATTGG       |
| PF3D7_0915200-1R      | AAAGTGGTAAATTTTCTGTATCATC   |
| PF3D7_0915200-2F      | CTTAAAAGAAATCGTGACCTCTC     |
| PF3D7_0915200-2R      | CTCCTTTATGTTATCTCTATCACATTC |
| PF3D7_0631500-1F      | ATAATAATATGGGAAATGAGATGG    |
| PF3D7_0631500-1R      | TCTGATGGGTCTGTTAATGTATAG    |
| PF3D7_0631500-2F      | GTTTTATCAACCATGACATTAGC     |
| PF3D7_0631500-2R      | TTCTGTGTGTATATTTGTCCCTT     |
| PF3D7_0631500-3F      | TATGAATGATAAATGGGAACATC     |
| PF3D7_0631500-3R      | AATTATTTTCTTCGCCATCTG       |
| PF3D7_0631500-4F      | AAAGACAATACAAAAGTGGATAATG   |
| PF3D7_0631500-4R      | TCTATCTTCCAATGAATTATGATG    |
| PF3D7_0701500-1F      | TGGAAAATGAGATGGAAAATC       |
| PF3D7_0701500-1R      | TCTGATGGGTCTGTTAATGTATAG    |
| PF3D7_0701500-2F      | GTTTTATCAACCATGACATTAGC     |
| PF3D7_0701500-2R      | TTCTGTGTGTATATTTGTCCCTT     |
| PF3D7_1039800-1F      | GTTTTATCAACCATGACATTAGC     |

|                  |                             |
|------------------|-----------------------------|
| PF3D7_1039800-1R | TGGAAAATGAGATGGAAAATC       |
| PF3D7_1039800-2F | TTCTGTGTGTATATTTTGTCTTC     |
| PF3D7_1039800-2R | TCTGATGGGTCTGTTAATGTATAG    |
| PF3D7_0823400-1F | CTGCAAGTAGTTGTCAATTAGAAG    |
| PF3D7_0823400-1R | ATCTTGAGATTCATTCCAACC       |
| PF3D7_0823400-2F | TCAGAATCTTCAACGCAAAC        |
| PF3D7_0823400-2R | AAATAATTTCCAATAAGCATATACATC |
| PF3D7_1029500-1F | AAAAGAACAAGATGTTGATGAAA     |
| PF3D7_1029500-1R | TTTGGAAGGGCAGATAAAAT        |
| PF3D7_0315900-1F | TATGTATCCTTCTAAATAAACAATGG  |
| PF3D7_0315900-1R | AAATATGATTGTTAGACGTTAATGC   |
| PF3D7_0315900-2F | AGGTTTAATGAAATAACACATTGC    |
| PF3D7_0315900-2R | TTTGGTGGTTTCTTATATGTCTTC    |
| PF3D7_1464200-1F | TCATAAACAAAATTGTATCTTTTCTC  |
| PF3D7_1464200-1R | AAATTTACATGCAGGATTATGAC     |
| PF3D7_1464200-2F | GGGGATAACAAATTAGAAAATAATG   |
| PF3D7_1464200-2R | CTGCGTATAATCTTCTTCTTCAC     |
| PF3D7_1465800-1F | CATTTACAAATTTATTGGCTAGG     |
| PF3D7_1465800-1R | TTTTCATCAGATTTATTTATCGAAC   |
| PF3D7_1465800-2F | TAAAATGTCTAAGTGTGGGTTTG     |
| PF3D7_1465800-2R | TTAATTCGTTCTTTTAAATCTTCG    |
| PF3D7_0408100-1F | TCAAGAGAAAGTTATATGCGTTG     |
| PF3D7_0408100-1R | TGTTCAATCCTTTGTTCTTGTAG     |
| PF3D7_0408100-2F | AAACGAAGAGAAACCTATAGACG     |
| PF3D7_0408100-2R | CTTTGAGTTCCTGAATAATTCG      |
| PF3D7_1441600-1F | AAATATGCTATAATGAAATCAGGAG   |
| PF3D7_1441600-1R | ACATGGTTGTTATTTGTTGTTTG     |
| PF3D7_1441600-2F | TTAATTTACAGCATCCGATTTAG     |
| PF3D7_1441600-2R | CATCATTTAAAGAATCGGGATAG     |
| PF3D7_0112100-1F | GAAATTGAAAATATAGCAACACG     |
| PF3D7_0112100-1R | TATAAGACTTTGCTTAAACGACTG    |
| PF3D7_0112100-2F | AATGAGAAAATTGTTAAGTGGTG     |
| PF3D7_0112100-2R | TCCCATTTTGTAGAATCTTTATG     |
| PF3D7_1473700-1F | ATTTGTATTGAATGTTTGAATCG     |
| PF3D7_1473700-1R | ATATCATTTTCTCTTGCACAATC     |
| PF3D7_1473700-2F | CAAAATCCACTACAACATCACG      |
| PF3D7_1473700-2R | GGTGTACATAACAAAATTCATCC     |
| PF3D7_0309700-1F | ATTTATTGCTCCGAATATTGAAC     |
| PF3D7_0309700-1R | CATTTAGCAATTATTTCCCTAAC     |
| PF3D7_0309700-2F | TTGAAAGATAAAAGAGTTTCTTCG    |
| PF3D7_0309700-2R | TATTATGCTCGTTCCTTTCTATG     |
| PF3D7_0501700-1F | GACTTAACAATAATCGCCAAAG      |
| PF3D7_0501700-1R | GTTTATTTCCCATCTTCTATTAAC    |
| PF3D7_0501700-2F | TTGTAAGCAATGATAAAGATTCAG    |
| PF3D7_0501700-2R | TACAACAATTCCATCTTCATTTAC    |
| PF3D7_0221500-1F | AACCTTGACCCTCAAACCTC        |

|                    |                              |
|--------------------|------------------------------|
| PF3D7_0221500-1R   | TCACTATTTATGTATTGTAATGTGAGAC |
| PF3D7_1237400-1F   | AATATACGTTTCATACCTTTTCATC    |
| PF3D7_1237400-1R   | AATTAGGTAACCTTCGAACAATCA     |
| PF3D7_0425100-2F   | AACTTGTATTGGAAGCCTTTG        |
| PF3D7_0425100-2R   | TAAAGAACCACAAAGTGCTAGAG      |
| PF3D7_1400900-3F   | AGTAAAATGCGTAGAACATTTCAG     |
| PF3D7_1400900-3R   | TTCTTCTAGCGTAAATTGTTTTG      |
| PF3D7_1400900-1F   | ACCGTACATGCTATAATTCAATG      |
| PF3D7_1400900-1R   | ATGGATGCTCCATCTTTAACTA       |
| PF3D7_1400900-2F   | TGATTTATCAAAACAATTTACGC      |
| PF3D7_1400900-2R   | CCAAAACAAGATTCCATATAACC      |
| PF3D7_1478300-1F   | TACATTGGTTCCGGTATTTG         |
| PF3D7_1478300-1R   | TTTCATTATATACTTCTTTGTGTTGC   |
| PF3D7_1478300-2F   | GGGTCATATGTATCAACATTTACAG    |
| PF3D7_1478300-2R   | AACATGCAAATACCGGAAC          |
| PF3D7_1479300-1F   | AATTTATCTGAAGTAAAATGCGTAG    |
| PF3D7_1479300-1R   | ATTATAACCTTCTGAACTGAAAGC     |
| PF3D7_1479300-2F   | TGATTTATCAAAACAATTTACGC      |
| PF3D7_1479300-2R   | ACCCAAAACAAGATTCCATATAC      |
| PF3D7_0221200-1F   | GAGCTGGTGCAGTTATAAGTATG      |
| PF3D7_0221200-1R   | GAAAAGACAACGAACAAAACACTAC    |
| PF3D7_0221200-2F   | AATTCCTTAAAATCAACTTCTGG      |
| PF3D7_0221200-2R   | AACTGCACCAGCTCCTAATAC        |
| PF3D7_0222200-1F   | GAAAATGAGATGGAAAATCATATAG    |
| PF3D7_0222200-1R   | TCTGATGGGTCTGTTAATGTATAG     |
| PF3D7_0222200-2F   | GTTTTATCAACCATGACATTAGC      |
| PF3D7_0222200-2R   | TTCTGTGTGTATATTTTGTCTTTC     |
| PF3D7_1303200.1-1F | ATAATACCACCACATACATCCAG      |
| PF3D7_1303200.1-1R | AAATGCATAGGGAGTAAGAAAAC      |
| PF3D7_1303200.1-2F | TAAGGAATTGGGTTTTCTTACTC      |
| PF3D7_1303200.1-2R | AAACCCTCATATTTTCTTTCAATAC    |
| PF3D7_1359100-1F   | TTAACTTTAGATATTTTGTTCATGGAG  |
| PF3D7_1359100-1R   | TACTTACTTCCTCTTCCAAATCC      |
| PF3D7_1359100-2F   | AAGGTAATGAACACGACAAAAG       |
| PF3D7_1359100-2R   | TCATCAGACATGATTAAATTGTTG     |
| PF3D7_0618900.1-1F | CAAAGAATAATATGAACGATGG       |
| PF3D7_0618900.1-1R | TTTTGATTTATCGACATTTTGC       |
| PF3D7_0618900.1-2F | AATGATTGTGATAAGGAACAATTAG    |
| PF3D7_0618900.1-2R | TTTCATAATTTTCTAGGCATTTG      |
| PF3D7_0615700-1F   | TTTGTAAGTTGTAAATGCTTGG       |
| PF3D7_0615700-1R   | GATAATCCTTCAATTTCTGAACC      |
| PF3D7_0615700-2F   | AGGTTCCCTACGGAAGTAATTATG     |
| PF3D7_0615700-2R   | TACCATTTGATCTATCTGTGTGG      |
| PF3D7_0604700-1F   | CTCTTGGAATTTAATATTGTGTTTC    |
| PF3D7_0604700-1R   | TTATATCCGTCTAGGTCTTTTACC     |
| PF3D7_0604700-2F   | GGGCTTGAGTACACTTAAAA         |

|                  |                              |
|------------------|------------------------------|
| PF3D7_0604700-2R | ATCTTCGTCTGGTAATATACACG      |
| PF3D7_0605900-1F | TCCTCCCAGGATTTTATGTC         |
| PF3D7_0605900-1R | ATTTCCGAACAAAATTAATAAGG      |
| PF3D7_0605900-2F | GTAGATTTTGTGACACCATTTT       |
| PF3D7_0605900-2R | ACTTGTATTCACCCACATGATTA      |
| PF3D7_0609100-1F | CAAAACATAAGCAGAAAAGTACG      |
| PF3D7_0609100-1R | TATATCACCATGTGTATGAGGTG      |
| PF3D7_0609100-2F | TGATTATTGGAACATCAACTGAC      |
| PF3D7_0609100-2R | AAAGATAAAGAAACCGTAACACC      |
| PF3D7_0819900-1F | AATGGAAAGAAATTTAGACATGG      |
| PF3D7_0819900-1R | TCATAGCAGATGATACTAGGATAATAGA |
| PF3D7_0819900-2F | AATATGATTTTATCCAATGTACGTG    |
| PF3D7_0819900-2R | TTGACTGTTTCTTCATCATTTTC      |
| PF3D7_1005300-1F | AGGAATGTTGAGAATGAAAAGAC      |
| PF3D7_1005300-1R | TCCTTGCATAATTCTTAAAACG       |
| PF3D7_1005300-2F | GTTGCCTATTTGACATACTTCTG      |
| PF3D7_1005300-2R | TTTTCGTCTTTTCATTCTCAAC       |
| PF3D7_1005300-3F | AAGAATTATTCATTCAGCATATTTT    |
| PF3D7_1005300-3R | TATGCTTCTTTTAATGGGAATG       |
| PF3D7_1337100-1F | AATCTTTGTGATGAAAATTATGG      |
| PF3D7_1337100-1R | ATATTCGAAGGCCAAATATAAAC      |
| PF3D7_0615900-1F | ATCCAAACAAACAGAAAAGAGAC      |
| PF3D7_0615900-1R | TCTATACAATCGTTTTGTTGTCC      |
| PF3D7_0615900-2F | TATTACATCAAAGGAATGTTTCG      |
| PF3D7_0615900-2R | TTAACCAAATTGTGGGAATAAG       |
| PF3D7_0713200-4F | TGATGGAAGGACAAAATATACG       |
| PF3D7_0713200-4R | CAATATCATTTTTCTTTAATATCTCG   |
| PF3D7_0713200-1F | TTTTGAGACAATGTAAAAGTTGC      |
| PF3D7_0713200-1R | TTCAATACATAATTAGATGAGGACAC   |
| PF3D7_0604300-1F | AATAATGTTCCCTGGTCATCTAC      |
| PF3D7_0604300-1R | TTATTCATGATTTTGTGATTGTG      |
| PF3D7_0604300-2F | TACATCCACAACAAAGGAAATC       |
| PF3D7_0604300-2R | CATTCTGTTACGAGTATTGTTCC      |
| PF3D7_1442800-1F | CACAACATGAAAATGTAATAGGC      |
| PF3D7_1442800-1R | CATCTTCCCTTTGTATATCCTTT      |
| PF3D7_1442800-2F | TAAACTTCTATCGAACAGGAAGA      |
| PF3D7_1442800-2R | AAAATGTAAATGCGAATCCTT        |
| PF3D7_0727800-1F | TTTGTTATAAGCATACGGAGAAG      |
| PF3D7_0727800-1R | AAACCTTTTCATTATTTTCAGGAG     |
| PF3D7_0727800-2F | ATCTTTTCGTTGTGTATAACAGG      |
| PF3D7_0727800-2R | CCTACAAAATATATGCACACCTC      |
| PF3D7_1459300-1F | AAAAGAAATAGTTTAAAAGAAGCAA    |
| PF3D7_1459300-1R | ATTACGAATATTTTGTTTTGTGG      |
| PF3D7_1459300-2F | TGAGAACAAATCAGTAAATGTAGGT    |
| PF3D7_1459300-2R | TTTTTTGCTTCTTTTAAACTATTTT    |
| PF3D7_0909900-1F | AAATGCATATCCTCCTATTGAAC      |

|                  |                              |
|------------------|------------------------------|
| PF3D7_0909900-1R | AATAACATAACCCTTCCGATAAC      |
| PF3D7_0909900-2F | ATACCACTCATCATTCCGATACAG     |
| PF3D7_0909900-2R | ATACCTGCATTATTTACATTTGG      |
| PF3D7_1476100-1F | GAAAACATTTGGGATGAAGTTG       |
| PF3D7_1476100-1R | TTTTGTATTTCTTCTTGAGATGG      |
| PF3D7_1476100-2F | ATAGCCATTTTAAGGAAAAGAAG      |
| PF3D7_1476100-2R | CAATATCTTCAATTTTCGTTTTTG     |
| PF3D7_0823100-1F | GAGTAAGTGAAGAAGAATTTGAGG     |
| PF3D7_0823100-1R | CTCTCTTCCTGTTGGATTTTC        |
| PF3D7_0823100_2F | ATATTAGATCCTGAATTTGATGAAG    |
| PF3D7_0823100_2R | AATAATTCTTCATTACCACTTTG      |
| PF3D7_1145000-1F | ATTATGTAAACCTGGATCTGTTG      |
| PF3D7_1145000-1R | TTCAGTGTAGTCATGTGTTTCAG      |
| PF3D7_1145000-2F | TTGAAAATTCTGAAACACATGAC      |
| PF3D7_1145000-2R | TCAATTCTTGACCTTGTATAGTTG     |
| PF3D7_1109400-1F | AATTTAGCGAATGAACAAAATG       |
| PF3D7_1109400-1R | TTCTTCAATAATGTCATCAAAGTG     |
| PF3D7_1109400-2F | AAAACACAAGCACTTGAGGAC        |
| PF3D7_1109400-2R | ATGCATTTCAATTGTTCTTTATTC     |
| PF3D7_1429400-1F | TTCCTCCTGAACTCTATGAAATC      |
| PF3D7_1429400-1R | TTCATATTTGTCTTCTCTTGTCG      |
| PF3D7_1429400-2F | ATTCACATATTTACAACGTAGGG      |
| PF3D7_1429400-2R | TTATCATTCGATATGCTCTCTTG      |
| PF3D7_1416200-1F | ATAGTGAACATGGAGGAGATAGC      |
| PF3D7_1416200-1R | AGTGTTGCAATATAAAGGTGATG      |
| PF3D7_1416200-2F | CTTATTGTTTATGTGCAGCTACC      |
| PF3D7_1416200-2R | TTCACCTGTTTTATAGGATTCAG      |
| PF3D7_0935200-1F | CCAATAGGATATGAAACCTTACC      |
| PF3D7_0935200-1R | AAAGCTCTTATGGATGCTATTTTC     |
| PF3D7_0935200-2F | AAATCATGGCCTCTAATTTTAAC      |
| PF3D7_0935200-2R | GACTACTGTTGTGTCGTTTGC        |
| PF3D7_1108900-1F | AATAATAATTGTGATGGCATGTG      |
| PF3D7_1108900-1R | TCTGTGTTGTTGGTCTCTTTTAC      |
| PF3D7_1108900-2F | TTGAGTTTCCAGATGATACATTC      |
| PF3D7_1108900-2R | TGATATTTGCTACATCATTTTCG      |
| PF3D7_1225000-1F | CATAAATCAACATGTACCAAACC      |
| PF3D7_1225000-1R | TTTAAAGCATAATTGCTCTTGTC      |
| PF3D7_1225000-2F | ATTTATACCAACAATTTTCTTACTTACA |
| PF3D7_1225000-2R | AGTGACATGTTCCCTACCCTTTA      |
| PF3D7_0717600-1F | TTCGGAGAATTGTAATTATGAAG      |
| PF3D7_0717600-1R | TACCTATATGAAGAACAGCATGG      |
| PF3D7_0717600-2F | GGAGTAGCTATAGGTGAAATTGG      |
| PF3D7_0717600-2R | AATCATTACAAGTCTCTTCATCG      |
| PF3D7_1334100-1F | ATGAATAGTTCCAACCTCAACTCC     |
| PF3D7_1334100-1R | AGTCTTTCTTCTTGATCGTTCTC      |
| PF3D7_1334100-2F | AAAATATGACACAACATTCGTTTC     |

|                  |                             |
|------------------|-----------------------------|
| PF3D7_1334100-2R | CATCTTCTTGTGGTTTGTGATAG     |
| PF3D7_0617100-1F | CCAGAAAGTACAACTTATGCAG      |
| PF3D7_0617100-1R | AAATATCCAAAAGAACCTATGATG    |
| PF3D7_0617100-2F | TCGATCCATATATACAAAATGAAG    |
| PF3D7_0617100-2R | TAGACTTGTGCGTTATTCAATC      |
| PF3D7_0821600-1F | AACAAACGAATAGGTTATCTGAAC    |
| PF3D7_0821600-1R | AAAACCATCTTCACCCTTATTC      |
| PF3D7_0821600-2F | ACGTGCAGGGTATTAAGAAG        |
| PF3D7_0821600-2R | CTTGATGTTGTTTCAGTATTATTCC   |
| PF3D7_1304600-1F | TTATCTATCGATTCTGAAATGGTC    |
| PF3D7_1304600-1R | TTATTGTGTAGAAATTTAAGTCGTC   |
| PF3D7_1304600-2F | TAACCACAACCAACCTTTAATAC     |
| PF3D7_1304600-2R | GGTGATTTCTTCACCTTCTTC       |
| PF3D7_1212200-1F | GAGTAGGAAAGAACAAGAAATGG     |
| PF3D7_1212200-1R | TCTTCATTATGTTCAAAGGTTTC     |
| PF3D7_1212200-2F | CGAATGTGAAATTAATGGTAAAC     |
| PF3D7_1212200-2R | ACATACATATTCTTTGGATTCCCTC   |
| PF3D7_1113000-1F | CAACATATTTGTGATTATGTACCAC   |
| PF3D7_1113000-1R | AATATTTATTTTCGTTTGGTTCC     |
| PF3D7_1113000-2F | AATTGATGTAATTCCTAAAAGCAC    |
| PF3D7_1113000-2R | CTATTTTCGTAAGAAATCATAGC     |
| PF3D7_1221600-1F | ATCAACAAGTACTGATCATTTC      |
| PF3D7_1221600-1R | TTGCTCCAACATCCTTTATATACT    |
| PF3D7_1221600-2F | AACCCTAGTTGTGAAAATGAAAT     |
| PF3D7_1221600-2R | CATATCAAATGTTCTGATTCTCC     |
| PF3D7_0417900-1F | AGGGAAGAAGTACGTTAGAAGG      |
| PF3D7_0417900-1R | ATTTGTTTCATTTGTTTCATTTG     |
| PF3D7_0417900-2F | CATATTGTAAAAGGAATGAAGAATG   |
| PF3D7_0417900-2R | TCCTCATCATCTATTTTGTGTTG     |
| PF3D7_1107700-1F | AAAGAAAACCTACCTGTACACCTG    |
| PF3D7_1107700-1R | TTGATTGAGCATTTTATTTATGG     |
| PF3D7_1107700-2F | AACAACCCACATGAACATACTAC     |
| PF3D7_1107700-2R | ACATGTCCATTATCAGCTTCAC      |
| PF3D7_0936900-1F | ACGTTTGGAATTAGATTTGTATG     |
| PF3D7_0936900-1R | CATTTCTCATTATTTCTGACCAC     |
| PF3D7_0936900-2F | ATGAAAGTCATGAAAGTTCAATC     |
| PF3D7_0936900-2R | ATTCACGTTCTCCAGTTTAAAG      |
| PF3D7_1314800-1F | AAAATTGAAGAAGAAAATCAAATG    |
| PF3D7_1314800-1R | TATCAGGTATGTCCTTTTATCC      |
| PF3D7_1314800-2F | TTATATCAAGGGAAAAATGGACT     |
| PF3D7_1314800-2R | AGATAAATCAAATAAGGCAAAGG     |
| PF3D7_0217000-1F | TAAACAAAAGGAGTTTCCAAAG      |
| PF3D7_0217000-1R | GTAGGAGTCGAGATAAGAAGAAAG    |
| PF3D7_0217000-2F | CAATGCTTATTCTTCATATATCTCAC  |
| PF3D7_0217000-2R | AAAATAAAAGAATGTAAACTAAAATGG |
| PF3D7_1301500-1F | CCGATATGTCAAAGAATGATATG     |



|                  |                             |
|------------------|-----------------------------|
| PF3D7_1301500-1R | TTCTTTTGTTAATGGTTTCGTAG     |
| PF3D7_1301500-2F | AAGTGTAGCAAAGGAAGGTTTAG     |
| PF3D7_1301500-2R | TCATTAATTTTCGTCCATAAAAATC   |
| PF3D7_0502100-1F | AATTGATGTGTATTCGTCTAATTATC  |
| PF3D7_0502100-1R | CATTTGACCATTTTGTATTAACC     |
| PF3D7_0502100-2F | GTGACGAGGAAAATGAAGAAG       |
| PF3D7_0502100-2R | CAAGATCATTGATAATTCTGGA      |
| PF3D7_1337700-1F | CCACAAAATGCATCTATCATATC     |
| PF3D7_1337700-1R | TGTAAATCATCCTCATCTTCAAC     |
| PF3D7_1337700-2F | TGAATGTAATACCTATGCGTGAG     |
| PF3D7_1337700-2R | ACATAATTGCATTTGTTGATAGG     |
| PF3D7_1133100-1F | TGATAGTGACGACGAAATTTATG     |
| PF3D7_1133100-1R | TGAATCACTGGTAGTTTTAGGATAG   |
| PF3D7_1133100-2F | AAGTATTAAGAGGGAATTCTTGAC    |
| PF3D7_1133100-2R | ATTATTGTTGTTGTTGTTGTTGC     |
| PF3D7_0912800-1F | AATTCTTGTAGCTCCATCATACC     |
| PF3D7_0912800-1R | TCGTAGTAACTTCAACCATATCC     |
| PF3D7_0912800-2F | CATGAAATTATTGAACCTAAGATATTG |
| PF3D7_0912800-2R | TAGGACTTGTTAGTTCATGTTTCG    |
| PF3D7_0928400-1F | GAATGTAATTCTTTTCCTGTGC      |
| PF3D7_0928400-1R | ACCCAGCATCATTCGTTATAG       |
| PF3D7_0928400-2F | TTGGTTATACGGTACTATTGATG     |
| PF3D7_0928400-2R | CTTATAATGGTTGGTATGGTTTTAC   |
| PF3D7_0905300-1F | TTGATGGTTCTAAAATTATGACG     |
| PF3D7_0905300-1R | CAAGATATTTCAAGTTTCACTTGC    |
| PF3D7_0905300-2F | GAGCATCAGACAAATAAAACAAG     |
| PF3D7_0905300-2R | CATCTTCTCATCTTCAAATTCAC     |
| PF3D7_0524100-1F | TGAAGTGGAGAAGCAAATATC       |
| PF3D7_0524100-1R | TTGTCTTTTACGTTTTGACAATC     |
| PF3D7_0524100-2F | AATGATGTTACAAATTTTAGGTACG   |
| PF3D7_05241002R  | AATATTCCTTCAAAGATCTCG       |
| PF3D7_1346200-1F | AATAACATGGAATGTACCAAAG      |
| PF3D7_1346200-1R | CAAATAATTGGTAATCAAGAATCC    |
| PF3D7_1346200-2F | AGCTAAGGAAAATGGAAGTATAGA    |
| PF3D7_1346200-2R | TTTTAATTTTTTGTTCCTACA       |
| PF3D7_1405300-1F | TTCAACATATCAATTTCAATTCC     |
| PF3D7_1405300-1R | CAACAAGTGAGTCTTATACAAATG    |
| PF3D7_1405300-2F | TCTGAGAAGGAAAATGAAAGC       |
| PF3D7_1405300-2R | TCGCACTTTGTATTATATGTTGG     |
| PF3D7_0916600-1F | CTATCCTTGATATTGGATGTGG      |
| PF3D7_0916600-1R | CAAAGATTGTTTTGGCTAGTTC      |
| PF3D7_0916600-2F | GGTTTCTTCTGAATTGCATAAAT     |
| PF3D7_0916600-2R | ACAATTTTCTTCAAACCATTCTT     |
| PF3D7_0901200-1F | TTTAGTTAAAGATGGAGCATCAA     |
| PF3D7_0901200-1R | TTTCTAATCTTTTGGGATTTTTC     |
| PF3D7_1475400-1F | TAATTATGAGAGCTACAGCATCG     |

|                    |                            |
|--------------------|----------------------------|
| PF3D7_1475400-1R   | TTTCATTTGAAGTTTTTCATTTTG   |
| PF3D7_1475400-3F   | AGAATATGAGCGATCAGGTG       |
| PF3D7_1475400-3R   | TGTTTCATCATACCAAATAGAAGC   |
| PF3D7_1475400-3F   | AATTAGCCGCAGTTTTTG         |
| PF3D7_1475400-3R   | TGATGTTTGAATCTTCCTTTTG     |
| PF3D7_0532100-1F   | TAATATCCTCTATTGCCACAGG     |
| PF3D7_0532100-1R   | CTTCAACATCTGAATCTAAATCG    |
| PF3D7_1301100-2F   | AAGTAAAATGCGTAGAACATTCA    |
| PF3D7_1301100-2R   | TTTTCTTAGTTCCAACACCATTA    |
| PF3D7_1301100-3F   | ATATGTGACAAAAGTGAAACAGAG   |
| PF3D7_1301100-3R   | CTTAATCCTGAATGTTCTACGC     |
| PF3D7_0208500-1F   | AAAGATGGAGTGTCCCTTACAAAT   |
| PF3D7_0208500-1R   | TTTTTAAAGAGCTAGATGGGTTT    |
| PF3D7_0211400-1F   | AAAAGGGATGAAAATATATCAATG   |
| PF3D7_0211400-1R   | TGATAACCATGTCTATATCTGAGG   |
| PF3D7_0615100-1F   | AGTCGAAAAGGTTATTTAGATGC    |
| PF3D7_0615100-1R   | TAATGAAATAATGCTGGATTGAG    |
| PF3D7_0615100-2F   | TGCTGGTATAGGAGATACAAATG    |
| PF3D7_0615100-2R   | ATTATAAACAGGAGGCCAAATAC    |
| PF3D7_0501300-1F   | AGAAGCTTTACTTAATGAATACGAAG |
| PF3D7_0501300-1R   | CAAAGAATAGGAATATCACAACATAG |
| PF3D7_0501300-2F   | TGTAATACCAGAAAATACTGAATCC  |
| PF3D7_0501300-2R   | TGAGCCATTCTACGTTGC         |
| PF3D7_1133400-1F   | TGCAGATATTCCCTGAACATAAAC   |
| PF3D7_1133400-1R   | AATAGTTGCTAATACAGCGACAG    |
| PF3D7_1133400-2F   | GAACGCTAGTATGATCAAAAGTG    |
| PF3D7_1133400-2R   | CCAATTATAACCCTTACCATGAC    |
| PF3D7_1335900-1F   | ATTCCATATTCACCATTATCTCC    |
| PF3D7_1335900-1R   | TTTTCATTATTTCTACCATGTGG    |
| PF3D7_1335900-2F   | TGGACTTGCTTATAAATTCGTAG    |
| PF3D7_1335900-2R   | TTCACCTAATGTTTCATCAAAAG    |
| PF3D7_0709900-1F   | ATATTTTACATCAGCCACCTATG    |
| PF3D7_0709900-1R   | GACATCTACATCTAGCCAATCAC    |
| PF3D7_0709900-2F   | CCTTTCATGATATCGTAAGTAGC    |
| PF3D7_0709900-2R   | CGCTTAAATAATACTCAGGGTTC    |
| PF3D7_1143500-1F   | CATCTCTCAAGCAATTTTCATAC    |
| PF3D7_1143500-1R   | AATTTTCTGTGTTTTTCGTCATAG   |
| PF3D7_1143500-2F   | AAAATATGTTGTGGATTCTCTTTC   |
| PF3D7_1143500-2R   | TGTTTATTTGAATATGTGCCTATG   |
| PF3D7_0625000.1-1F | TCCTACATGTCAACCATTAAC      |
| PF3D7_0625000.1-1R | GGTACATTCATAAACTTGAGCAG    |
| PF3D7_0625000.1-2F | CATTATTTGAAGGACAAGAAAAC    |
| PF3D7_0625000.1-2R | TATTATGGTAGCACAACCAAAC     |
| PF3D7_0625100-1F   | CAACATTAGAAACGTGCTTACC     |
| PF3D7_0625100-1R   | GAATGTCCTGATACAATCAAATC    |
| PF3D7_0625100-2F   | AATATTCATGCAAAGCCATTC      |

|                  |                             |
|------------------|-----------------------------|
| PF3D7_0625100-2R | GCATAATCTAAGGTATAATTCAATCC  |
| PF3D7_1147200-1F | TCAAATATTCCAAATTGTCAAAG     |
| PF3D7_1147200-1R | AACTACTTCTCTCCACCTTATGC     |
| PF3D7_1147200-2F | GGAATTTTCACTTTATTCAGAGG     |
| PF3D7_1147200-2R | TTACTACCCATACCTTCATTTC      |
| PF3D7_1471500-1F | TTTTGGATATTTTGTGATACTGC     |
| PF3D7_1471500-1R | TTTGAGTTCCTTATAATCCTTTTC    |
| PF3D7_1471500-2F | TTGTACAGGGGCATATGAAG        |
| PF3D7_1471500-2R | TAAGTGAAAGGGTATAGGAAACG     |
| PF3D7_0801900-1F | GATGACGCTGAAGAATATTATGA     |
| PF3D7_0801900-1R | ATTATTTTCTTTCTGGGTGTAA      |
| PF3D7_0801900-2F | ATGTACAAACAAAACGTATGACC     |
| PF3D7_0801900-2R | TTTTGTATAATTTCCACATGCTC     |
| PF3D7_0315600-1F | CTTGCAACTGCACGTATAATC       |
| PF3D7_0315600-1R | TGCATAAATCGTTTTCTTTATTG     |
| PF3D7_0315600-2F | CCGAGAATAATTTTACCTCACC      |
| PF3D7_0315600-2R | TTGCGTTGTCTTTTGTGTTG        |
| PF3D7_0513700-1F | ATATGTGCAACTCAATGACAAAG     |
| PF3D7_0513700-1R | TTCTGAAGAAAATGTAATTCTGTATG  |
| PF3D7_0513700-2F | TTTCATAAAGGTGGCCATAAC       |
| PF3D7_0513700-2R | TTGAATATCCATAGGAACAGATATTAG |
| PF3D7_1462600-1F | TTGTTTTCGTATGGACAAATG       |
| PF3D7_1462600-1R | TTGAAGTACAAATAGAACGAAATG    |
| PF3D7_1462600-2F | ATTATCCTCTGATGCTCCTTTAG     |
| PF3D7_1462600-2R | GTTTCAAGGAAGGTTTGTCTATC     |
| PF3D7_1215200-1F | CGTATGATTGAAAATGTAGGAAC     |
| PF3D7_1215200-1R | AGTAAAATTGAAGAATGGAGGTC     |
| PF3D7_1215200-2F | TGTAGGAACAAAATTAGGACATC     |
| PF3D7_1215200-2R | TTCAGTAAAATTGAAGAATGGAG     |
| PF3D7_1121500-1F | AAATATAGGCCATCTGTTGTTTC     |
| PF3D7_1121500-1R | GGAATATCGTTTATTAATTCCATC    |
| PF3D7_1121500-2F | AAAGAACAACCGTATTAGAAGAAG    |
| PF3D7_1121500-2R | AAGCCTCCTCTTTATCACTCTC      |
| PF3D7_1129600-1F | ATATAATCAAACGACAGGTTGTG     |
| PF3D7_1129600-1R | GCTACTTATTTTGTGATGCTCTG     |
| PF3D7_1129600-2F | GTACGAGTGATCATATTTCAACC     |
| PF3D7_1129600-2R | ATTCTTGTGCGTTTTATCTTTTC     |
| PF3D7_1301700-1F | CGTTACAGATTACAACAACACCT     |
| PF3D7_1301700-1R | GCTGCTCTAACATTATTGAAATG     |
| PF3D7_0220200-1F | TTATTTTCTGGTGTAGATGATGG     |
| PF3D7_0220200-1R | ATTGATTTTCACCTTCTTTTCATT    |
