# Supplementary material for: Identification of Novel Pre-Erythrocytic Malaria Antigen Candidates for Combination Vaccines with Circumsporozoite Protein
Source: PubMed Central journal article supplement (PMC4951032; doi:10.1371/journal.pone.0159449), 2016-07-19
Supplement: pone.0159449.s007.pdf [file pone.0159449.s007.pdf]

**S2 Table. Primers to amplify inserts for DNA vaccine constructs**

| <b>Py DNA vaccines</b> |                                                          |
|------------------------|----------------------------------------------------------|
| <b>Gene Name</b>       | <b>Primer sequence with LIC appendage</b>                |
| PyCSP - F              | CGC CCA GCG GCA CCG GC atg TTAAACGAGCTATGTTACAATGA       |
| PyCSP - R              | CAC GCA CGC GAG CGG GC tta ACATTTATCCATTTTACAAATTCAG     |
| PyPF3D7_1308500 - F    | CG CCC AGC GGC ACC GGC atg ATAATAAGAGCAGATATTGAAAGGAG    |
| PyPF3D7_1308500 - R    | CA CGC ACG CGA GCG GGC tta GTATATTATATTAAGGGCCTGCTC      |
| PyPF3D7_0727200 - F    | CG CCC AGC GGC ACC GGC atg GTCTTTAAAATTTCCAAAACCTCTG     |
| PyPF3D7_0727200 - R    | CA CGC ACG CGA GCG GGC tta TGGATAATTTCCAGATGTATTTTT      |
| PyPF3D7_0730200 - F    | CG CCC AGC GGC ACC GGC atg AGCGAGATTAACAATTTAAAAGAA      |
| PyPF3D7_0730200 - R    | CA CGC ACG CGA GCG GGC tta AAAATCTATGAATATGTCCCTGAA      |
| PyPF3D7_0818900 - F    | CG CCC AGC GGC ACC GGC atg GCTAACGCAAAAGC                |
| PyPF3D7_0818900 - R    | CA CGC ACG CGA GCG GGC tta ATCAACTTCTTCAACAGTTGGTC       |
| PyPF3D7_1026400 - F    | CG CCC AGC GGC ACC GGC atg ACATCATTTAAAATGGAATATATTTGG   |
| PyPF3D7_1026400 - R    | CA CGC ACG CGA GCG GGC tta TCTGATTATTTTCATAACAATTTTCA    |
| PyPF3D7_1111200 - F    | CG CCC AGC GGC ACC GGC atg GAAACGGGGGTCAATATTAGCA        |
| PyPF3D7_1111200 - R    | CA CGC ACG CGA GCG GGC tta CTCAAATTGGGCACTATTACGTTTC     |
| PyPF3D7_1122200 - F    | CG CCC AGC GGC ACC GGC atg AGGAATAATATAGAAAATGTAAA       |
| PyPF3D7_1122200 - R    | CA CGC ACG CGA GCG GGC tta TTTCTCATTTGAAAAGGATTTG        |
| PyPF3D7_1134000 - F    | CG CCC AGC GGC ACC GGC atg GCTGGCTTTAATAAAAATG           |
| PyPF3D7_1134000 - R    | CA CGC ACG CGA GCG GGC tta TGCATTATCTTTGTTTTCTTCT        |
| PySLARP1 - 4F          | CG CCC AGC GGC ACC GGC atg AACGATTTTAATTTGGGCTTAA        |
| PySLARP1 - 4R          | CA CGC ACG CGA GCG GGC tta GCTTTGATTAGTATCACAACCACT      |
| PySLARP1 - 6F          | CGC CCA GCG GCA CCG GC atg TATTTACGAGGAAGACAAGTTCA       |
| PySLARP1 - 6R          | CAC GCA CGC GAG CGG GC tta CATTATTTCAAATTTATATGGGAGTT    |
| PyPF3D7_1302200 - F    | CGC CCA GCG GCA CCG GC atg AACCTTGCTTTTGTGAGGATGCAG      |
| PyPF3D7_1302200 - R    | CA CGC ACG CGA GCG GGC tta TTTTGGT TGATATTGTT CTTTAAGAAA |
| PyPF3D7_1323000 - F    | CG CCC AGC GGC ACC GGC atg ATAATTTTTGTTTACGTCCTTTTTTC    |
| PyPF3D7_1323000 - R    | CA CGC ACG CGA GCG GGC tta TTTTGACATTGCAAAAATCATAT       |

|                               |                                                          |
|-------------------------------|----------------------------------------------------------|
| PyPF3D7_1411500 - F           | CG CCC AGC GGC ACC GGC atg TTTTTCTCATATATAGGCACCAT       |
| PyPF3D7_1411500 - R           | CA CGC ACG CGA GCG GGC tta TTGTATATATTTTCATGTTAAAATGTGG  |
| PyLISP1 - 1F                  | CG CCC AGC GGC ACC GGC atg ATAGAATACAACCTTACTAGGAAGTGCAC |
| PyLISP1 - 1R                  | CA CGC ACG CGA GCG GGC tta CCTCACCTTAAAATATGGATCACC      |
| PyLISP1 - 2F                  | CG CCC AGC GGC ACC GGC atg GGTGATCCATATTTTAAGGTGAG       |
| PyLISP1 - 2R                  | CA CGC ACG CGA GCG GGC tta CTGATCAATGGTAATAAACTCG        |
| PyLISP1 - 3F                  | CG CCC AGC GGC ACC GGC atg GAGTTTATTACCATTGATCAGAATGG    |
| PyLISP1 - 3R                  | CA CGC ACG CGA GCG GGC tta TGCATTTGTATGATGTAAAAGTAAATA   |
| PyPF3D7_1434400 - F           | CG CCC AGC GGC ACC GGC atg TATTATATTACACAAAAAATATTTTCAG  |
| PyPF3D7_1434400 - R           | CA CGC ACG CGA GCG GGC tta ATAAAAATAATGAGAAGAATTCTTGG    |
| PyPF3D7_1456100 - F           | CG CCC AGC GGC ACC GGC atg AAAATTGTAAAGAACTTTCTAAAA      |
| PyPF3D7_1456100 - R           | CA CGC ACG CGA GCG GGC tta TGATGGGGATGGAAACA             |
| PyPF3D7_0103400 - 2F          | CGC CCA GCG GCA CCG GC atg TTTAGGCTTTATAGTAGTGGA         |
| PyPF3D7_0103400 - 2R          | CAC GCA CGC GAG CGG GC tta AAGACATATCCCAAACTAACCC        |
| PyPF3D7_0103400 - 3F          | CGC CCA GCG GCA CCG GC atg AACTTGAGTGGAAAATTAATAATATG    |
| PyPF3D7_0103400 - 3R          | CAC GCA CGC GAG CGG GC tta CTTAGCATGCCAATTCG             |
| PyPF3D7_0304300 - F           | CG CCC AGC GGC ACC GGC atg ATTGGTAATATAAAAAGGGAAACAA     |
| PyPF3D7_0304300 - R           | CA CGC ACG CGA GCG GGC tta AACGTCGTTAGTAATTTTGTCA        |
| PyPF3D7_0405500 - F           | CG CCC AGC GGC ACC GGC atg AACGAAAAAATTATTAAGGA          |
| PyPF3D7_0405500 - R           | CA CGC ACG CGA GCG GGC tta TTCTTTACTATCAACTTCTATTTTTTCT  |
| PyPF3D7_0506200 - F           | CG CCC AGC GGC ACC GGC atg GACGAAAACGATGATCT             |
| PyPF3D7_0506200 - R           | CA CGC ACG CGA GCG GGC tta GTAAATATCTTGAAAAACGGTGTTA     |
| PyPF3D7_1207400 - F           | CG CCC AGC GGC ACC GGC atg AGTTATTCCAATAGTAGCATAAAA      |
| PyPF3D7_1207400 - R           | CA CGC ACG CGA GCG GGC tta CGCCAAATTTATGGAATGA           |
| PyPF3D7_1241500 - F           | CG CCC AGC GGC ACC GGC atg GAAAAACACCTTGAAAAA            |
| PyPF3D7_1241500 - R           | CA CGC ACG CGA GCG GGC tta TGCATGAAATATAGATGGTG          |
| <b><i>Pb</i> DNA vaccines</b> |                                                          |
| <b>Gene Name</b>              | <b>Primer sequence with LIC appendage</b>                |
| PbCSP - F                     | CGC CCA GCG GCA CCG GC atg GGATATGGACAAAATAAAAGCAT       |

|                     |                                                          |
|---------------------|----------------------------------------------------------|
| PbCSP - R           | CAC GCA CGC GAG CGG GC tta TATACTTGAACATTTATCCATTTTACAA  |
| PbPF3D7_1308500 - F | CG CCC AGC GGC ACC GGC atg TTATTAAGAAAGAGATGCATTGAAA     |
| PbPF3D7_1308500 - R | CA CGC ACG CGA GCG GGC tta GTTAGATGAGTAAATTATATTAAGAGCC  |
| PbPF3D7_0727200 - F | CG CCC AGC GGC ACC GGC atg AAAGTCTTTAAAATTGCAA           |
| PbPF3D7_0727200 - R | CA CGC ACG CGA GCG GGC tta GGTCCATATAAAATTTGGGGTA        |
| PbPF3D7_0730200 - F | CG CCC AGC GGC ACC GGC atg AGCGAGATTAACAATTTAAAAGAAG     |
| PbPF3D7_0730200 - R | CA CGC ACG CGA GCG GGC tta CATAAAATCTATGAATATGTCCCTG     |
| PbPF3D7_0818900 - F | CG CCC AGC GGC ACC GGC atg GCTAACGCAAAGC                 |
| PbPF3D7_0818900 - R | CA CGC ACG CGA GCG GGC tta ATCAACTTCTTCAACAGTTG          |
| PbPF3D7_1026400 - F | CG CCC AGC GGC ACC GGC atg TTTTGTGAGTTTATAACAAATG        |
| PbPF3D7_1026400 - R | CA CGC ACG CGA GCG GGC tta TTCATAATAATTTTCAAAGGGAAA      |
| PbPF3D7_1111200 - F | CG CCC AGC GGC ACC GGC atg GAATATAAATCCTTATTAATTGAAAAAC  |
| PbPF3D7_1111200 - R | CA CGC ACG CGA GCG GGC tta GAAACTTAATTTCTCAGCTATATTTTT   |
| PbPF3D7_1122200 - F | CG CCC AGC GGC ACC GGC atg AGGAATAGTATAGAAAATGTAAATG     |
| PbPF3D7_1122200 - R | CA CGC ACG CGA GCG GGC tta AAAAGAAGAATTAAGACCCTTAAC      |
| PbPF3D7_1134000 - F | CG CCC AGC GGC ACC GGC atg TTTGAGGTAAAAGCTACAAATG        |
| PbPF3D7_1134000 - R | CA CGC ACG CGA GCG GGC tta GCTTTCTTGAACCATTTT            |
| PbSLARP - F         | CG CCC AGC GGC ACC GGC atg AATGAAGTAAAATATAATGAAGGCT     |
| PbSLARP - R         | CA CGC ACG CGA GCG GGC tta GGAGCTCCTTAATGGATATAGAAA      |
| PbPF3D7_1302200 - F | CG CCC AGC GGC ACC GGC atg AACACCCTCAATGTCTTT            |
| PbPF3D7_1302200 - R | CA CGC ACG CGA GCG GGC tta TTTAAGAAAATGCTCCACACC         |
| PbPF3D7_1323000 - F | CG CCC AGC GGC ACC GGC atg AAACTTTTTATAATTTTTTGTTTACG    |
| PbPF3D7_1323000 - R | CA CGC ACG CGA GCG GGC tta TTTTGACATTGCAAAAATCA          |
| PbPF3D7_1411500 - F | CG CCC AGC GGC ACC GGC atg AAGGAAAATTGTACGAAGAAAAG       |
| PbPF3D7_1411500 - R | CA CGC ACG CGA GCG GGC tta TTCTAAAAATTTATGAAAACATTG      |
| PbLISP1 - 1F        | CG CCC AGC GGC ACC GGC atg AAAAATAGAGAATACAACCTACTAGGAAA |
| PbLISP1 - 1R        | CA CGC ACG CGA GCG GGC tta CTCACAATTGCAGTTATTACCAT       |
| PbLISP1 - 5F        | CG CCC AGC GGC ACC GGC atg GGTAATATGAGCCATTTTGAATT       |
| PbLISP1 - 5R        | CA CGC ACG CGA GCG GGC tta GAATATGGAAATAGAAAATCAAT       |
| PbPF3D7_1434400 - F | CG CCC AGC GGC ACC GGC atg GATAATATTGGTGTCTTCTGAAGAAG    |

|                      |                                                          |
|----------------------|----------------------------------------------------------|
| PbPF3D7_1434400 - F  | CA CGC ACG CGA GCG GGC tta AAAATAATGGGAAGAATTTTTGG       |
| PbPF3D7_1456100 - F  | CG CCC AGC GGC ACC GGC atg GAACTCTCTAAAAACGGGAAA         |
| PbPF3D7_1456100 - R  | CA CGC ACG CGA GCG GGC tta TGATGGGGATGGAAAC              |
| PbPF3D7_0103400 - 1F | CG CCC AGC GGC ACC GGC atg CTCCAAGGGAAAGAAAAAAT          |
| PbPF3D7_0103400 - 1R | CA CGC ACG CGA GCG GGC tta CATTGCATAACTTGCATTCGTTT       |
| PbPF3D7_0103400 - 2F | CG CCC AGC GGC ACC GGC atg GAAACGAATGCAAGTTATGC          |
| PbPF3D7_0103400 - 2R | CA CGC ACG CGA GCG GGC tta TCTACCACTCTCTGTCTTTTTCTTA     |
| PbPF3D7_0304300 - 1F | CG CCC AGC GGC ACC GGC atg CTAAAGTTTTTCGAAATATTTTA       |
| PbPF3D7_0304300 - 1R | CA CGC ACG CGA GCG GGC tta TACGATTTTCATTGCAAAATAGG       |
| PbPF3D7_0304300 - 2F | CG CCC AGC GGC ACC GGC atg CTATTTTGCAATGAAATCGTACT       |
| PbPF3D7_0304300 - 2R | CA CGC ACG CGA GCG GGC att ACGCGTTTTACAAAAA              |
| PbPF3D7_0405500 - F  | CG CCC AGC GGC ACC GGC atg AACGAAAAAATTATTAAGGAC         |
| PbPF3D7_0405500 - R  | CA CGC ACG CGA GCG GGC tta TATTTCTTACTATTAACTTCTATCTTTT  |
| PbPF3D7_0506200 - F  | CG CCC AGC GGC ACC GGC atg CTTTTAAACAAAAATAATACATTGG     |
| PbPF3D7_0506200 - R  | CA CGC ACG CGA GCGGGC tta TACTAGGACATTGTAAATATCTTGAAAAAC |
| PbPF3D7_1207400 - F  | CG CCC AGC GGC ACC GGC atg GAATTAGAAGAAAAAGAAGACGAA      |
| PbPF3D7_1207400 - R  | CA CGC ACG CGA GCG GGC tta CGCCAAATTTATGGAATGA           |
| PbPF3D7_1241500 - F  | CG CCC AGC GGC ACC GGC atg GAAAAACAACCTGAAAAGG           |
| PbPF3D7_1241500 - R  | CA CGC ACG CGA GCG GGC tta CTTTTATTTTCTTCAAATGTATCA      |
