# Supplementary material for: Identification of Novel Pre-Erythrocytic Malaria Antigen Candidates for Combination Vaccines with Circumsporozoite Protein
Source: PubMed Central journal article supplement (PMC4951032; doi:10.1371/journal.pone.0159449), 2016-07-19
Supplement: pone.0159449.s008.pdf [file pone.0159449.s008.pdf]

**S3 Table. Peptides used for in vitro stimulation of splenocytes from DNA immunized mice**

| <b>PyCSP</b> | <b>PyPF3D7_1456100</b>                                                                                                                      | <b>PySLARP</b>                                                                                                                                                        | <b>PyPF3D7_1207400</b>                                                                  | <b>PyPF3D7_0506200</b>                                                                               |
|--------------|---------------------------------------------------------------------------------------------------------------------------------------------|-----------------------------------------------------------------------------------------------------------------------------------------------------------------------|-----------------------------------------------------------------------------------------|------------------------------------------------------------------------------------------------------|
| SYVPSAEQI    | SANSNLTFI<br>FNYEFITTL<br>IMIITFTLL<br>QSLQNYNSL<br>SNLTFLEYL<br>LYIKNNDKI<br>FYRKGFKQI<br>ICYEYEDNL<br>ININKSTYV<br>TNYLTALGM<br>STYKQKSYL | HYQMMINNI<br>AQYNYLNDL<br>NYQITNMPL<br>YYVNDNDHI<br>INFNSLNHI<br>NYIHQDSSN<br>SQNSQNSNI<br>IYDNNRQNI<br>RTFCNYNNI<br>VYTYRNNNI<br>KYTKGIQTT<br>LYRNNNKYI<br>SIQNTQNSI | KYILACNSI<br>LYIKSINNI<br>TYMSPINQI<br>VVF EKDTFL<br>VSKTKLIRL<br>CYNKCDAV<br>DTFLRYLYI | SSANLDTEI<br>KLNTVFQDI<br>IYNVLVQYK<br>KNFKIENII<br>LVYRYKPTS<br>KSFDKNNQI<br>KSLQKLNTV<br>SNLKSIVLI |
