# Supplementary material for: Identification of Novel Pre-Erythrocytic Malaria Antigen Candidates for Combination Vaccines with Circumsporozoite Protein
Source: PubMed Central journal article supplement (PMC4951032; doi:10.1371/journal.pone.0159449), 2016-07-19
Supplement: pone.0159449.s009.pdf [file pone.0159449.s009.pdf]

**S4 Table. Primers to amplify construct inserts for myc-epitope tagging of proteins in transgenic *Py* parasites**

| <b>Primer Name</b>          | <b>Primer Sequence</b>                 |
|-----------------------------|----------------------------------------|
| SacII-PyPF3D7_0730200rep FW | CCGCGGCGGCGGAATCCCCTTA                 |
| SpeI-PyPF3D7_0730200rep-REV | ACTAGTCATAAAAATCTATGAATATGTCCC         |
| SacII-PyPF3D7_1241500-5U-FW | AAACCGCGGAGCACTAGCTGGTATAGTGCCTATAAG   |
| XbaI-PyPF3D7_1241500-REV    | GGGTCTAGATGCATGAAATATAGATGGTGTTGC      |
| SacII-PyPF3D7_0506200-5U-FW | AAACCGCGGTATTGGCTCGTTTCGAATTTTTTCAAATC |
| XbaI-PyPF3D7_0506200-REV    | GGGTCTAGAACTTTTATATTGTACTAAGACA        |
