# Supplementary material for: Identification of Novel Pre-Erythrocytic Malaria Antigen Candidates for Combination Vaccines with Circumsporozoite Protein
Source: PubMed Central journal article supplement (PMC4951032; doi:10.1371/journal.pone.0159449), 2016-07-19
Supplement: pone.0159449.s010.pdf [file pone.0159449.s010.pdf]

**S5 Table. LS burden reduction after vaccination with individual antigens.**

| <i>Pb</i> single antigen   |              |                        | <i>Py</i> single antigen     |              |                        |
|----------------------------|--------------|------------------------|------------------------------|--------------|------------------------|
| Antigen                    | % Reduction  | P-value (N)            | Antigen                      | % Reduction  | P-value                |
| <b>CSP<sup>a</sup></b>     | <b>84.36</b> | <b>&lt;0.001 (53)</b>  | PF3D7_1323000 <sup>b</sup>   | 90.22        | 0.001 (8)              |
| PF3D7_0730200 <sup>a</sup> | 74.82        | 0.019 (5)              | <b>CSP<sup>b</sup></b>       | <b>76.23</b> | <b>&lt;0.001 (33)</b>  |
| PF3D7_0818900 <sup>a</sup> | 68.63        | 0.019 (5)              | PF3D7_1308500 <sup>c</sup>   | 71.48        | 0.006 (5)              |
| PF3D7_1411500 <sup>a</sup> | 61.18        | 0.008 (10)             | PF3D7_0727200 <sup>b</sup>   | 70.48        | 0.001 (9)              |
| <b>CSP<sup>b</sup></b>     | <b>59.96</b> | <b>&lt;0.001 (19)</b>  | PF3D7_1122200 <sup>b</sup>   | 65.58        | 0.085 (9) <sup>#</sup> |
| LISP1-1 <sup>a</sup>       | 58.96        | 0.018 (5)              | PF3D7_1302200 <sup>b</sup>   | 61.13        | 0.019 (10)             |
| PF3D7_1111200 <sup>a</sup> | 57.49        | 0.018 (5)              | PF3D7_1434400 <sup>b</sup>   | 60.96        | 0.021 (15)             |
| LISP1-1 <sup>b</sup>       | 55.59        | 0.033 (5)              | PF3D7_1207400 <sup>c</sup>   | 60.24        | 0.006 (5)              |
| PF3D7_1456100 <sup>b</sup> | 54.28        | 0.015 (4)              | SLARP-4 <sup>c</sup>         | 54.08        | 0.012 (5)              |
| LISP1-5 <sup>b</sup>       | 53.95        | 0.010 (5)              | PF3D7_1122200 <sup>c</sup>   | 52.84        | 0.006 (5)              |
| PF3D7_1456100 <sup>a</sup> | 51.35        | <0.000 (14)            | PF3D7_0304300 <sup>c</sup>   | 51.79        | 0.011 (5)              |
| LISP1-5 <sup>a</sup>       | 50.84        | 0.023 (10)             | PF3D7_1411500 <sup>a</sup>   | 50.65        | 0.011 (5)              |
| PF3D7_1122200 <sup>a</sup> | 48.34        | 0.072 (5) <sup>#</sup> | LISP1-3 <sup>c</sup>         | 48.11        | 0.006 (5)              |
| PF3D7_1207400 <sup>b</sup> | 48.05        | 0.011 (5)              | PF3D7_1308500 <sup>a</sup>   | 46.19        | 0.004 (10)             |
| PF3D7_1241500 <sup>a</sup> | 44.42        | 0.001 (15)             | <b>CSP<sup>a</sup></b>       | <b>45.75</b> | <b>&lt;0.001 (35)</b>  |
| <b>CSP<sup>c</sup></b>     | <b>41.46</b> | <b>0.006 (5)</b>       | PF3D7_1241500 <sup>c</sup>   | 45.42        | 0.006 (5)              |
| PF3D7_0506200 <sup>a</sup> | 34.33        | 0.005 (20)             | PF3D7_1134000 <sup>a</sup>   | 41.83        | 0.015 (10)             |
| PF3D7_1323000 <sup>b</sup> | 30.91        | 0.011 (5)              | PF3D7_0730200 <sup>a</sup>   | 40.99        | 0.009 (15)             |
| PF3D7_1241500 <sup>b</sup> | 26.48        | 0.015 (4)              | PF3D7_0103400-2 <sup>a</sup> | 39.89        | 0.030 (5)              |
| PF3D7_0405500 <sup>a</sup> | 25.87        | 0.027 (10)             | PF3D7_0103400-3 <sup>c</sup> | 39.73        | 0.006 (5)              |
| PF3D7_1111200 <sup>b</sup> | 24.84        | 0.015 (4)              | PF3D7_1323000 <sup>c</sup>   | 38.06        | 0.030 (5)              |
|                            |              |                        | PF3D7_1122200 <sup>a</sup>   | 35.88        | 0.006 (10)             |
|                            |              |                        | <b>CSP<sup>c</sup></b>       | <b>34.17</b> | <b>0.001 (30)</b>      |
|                            |              |                        | PF3D7_1026400 <sup>b</sup>   | 33.17        | 0.047 (9)              |
|                            |              |                        | PF3D7_1302200 <sup>a</sup>   | 31.81        | 0.007 (10)             |
|                            |              |                        | PF3D7_1241500 <sup>a</sup>   | 30.30        | 0.013 (10)             |
|                            |              |                        | PF3D7_1323000 <sup>a</sup>   | 23.24        | 0.009 (10)             |
|                            |              |                        | PF3D7_0730200 <sup>b</sup>   | 19.57        | 0.056 (5) <sup>#</sup> |
|                            |              |                        | PF3D7_0304300 <sup>a</sup>   | 17.12        | 0.047 (10)             |

Median percent reduction in LS burden per tested antigen, as compared to empty vector. Antigens are listed from greatest to smallest percent reduction. Only antigens that significantly (# or nearly significantly) reduced LS burden are shown. CSP is shown in bold.

<sup>a</sup>GG immunization; <sup>b</sup>EP immunization; <sup>c</sup>IM immunization. (N), Number of mice used for immunization
